# Supplementary material for: Measurement of glomerular filtration rate using endogenous d-serine clearance in living kidney transplant donors and recipients
Source: PubMed Central journal article supplement (PMC8654629; doi:10.1016/j.eclinm.2021.101223), 2021-12-05
Supplement: mmc2.pdf [file mmc2.pdf]

## **Supplementary information**

**Determination of glomerular filtration rate using endogenous D-serine clearance in living kidney transplant donors and recipients**

**Masataka Kawamura, Atsushi Hesaka, Ayumu Taniguchi, Shigeaki Nakazawa, Toyofumi Abe, Maiko Nakane, Masashi Mita, Masaru Horio, Shiro Takahara, Norio Nonomura, Yoshitaka Isaka, Ryoichi Imamura, Tomonori Kimura**

**6 Supplementary tables**

**5 Supplementary figures**

**Supplementary Table 1: List of equations for estimated glomerular filtration rate (eGFR) used in this study.**

| Equations         | Serum creatinine | Serum cystatin C | Equation for estimating GFR                                                                            |
|-------------------|------------------|------------------|--------------------------------------------------------------------------------------------------------|
| Japanese eGFR_cre |                  |                  |                                                                                                        |
| Female of male    |                  |                  | $194 \times \text{SCr}^{-1.094} \times \text{age}^{-0.287} [\times 0.739 \text{ if female}]$           |
| Japanese eGFR_cys |                  |                  |                                                                                                        |
| Female            |                  |                  | $(104 \times \text{SCys}^{-1.019} \times 0.996^{\text{Age}} \times 0.929) - 8$                         |
| Male              |                  |                  | $(104 \times \text{SCys}^{-1.019} \times 0.996^{\text{Age}}) - 8$                                      |
| CKD-EPI_cre       |                  |                  |                                                                                                        |
| Female            | $\leq 0.7$       |                  | $144 \times (\text{SCr} / 0.7)^{-0.329} \times 0.993^{\text{Age}}$                                     |
| Female            | $> 0.7$          |                  | $144 \times (\text{SCr} / 0.7)^{-1.209} \times 0.993^{\text{Age}}$                                     |
| Male              | $\leq 0.9$       |                  | $141 \times (\text{SCr} / 0.9)^{-0.411} \times 0.993^{\text{Age}}$                                     |
| Male              | $> 0.9$          |                  | $141 \times (\text{SCr} / 0.9)^{-1.209} \times 0.993^{\text{Age}}$                                     |
| CKD-EPI_cys       |                  |                  |                                                                                                        |
| Female of male    |                  | $\leq 0.8$       | $133 \times (\text{SCys} / 0.8)^{-0.499} \times 0.996^{\text{Age}} [\times 0.932 \text{ if female}]$   |
| Female of male    |                  | $> 0.8$          | $133 \times (\text{SCys} / 0.8)^{-1.328} \times 0.996^{\text{Age}} [\times 0.932 \text{ if female}]$   |
| CKD-EPI_cre-cys   |                  |                  |                                                                                                        |
| Female            | $\leq 0.7$       | $\leq 0.8$       | $130 \times (\text{SCr} / 0.7)^{-0.248} \times (\text{SCys} / 0.8)^{-0.375} \times 0.995^{\text{Age}}$ |
|                   |                  | $> 0.8$          | $130 \times (\text{SCr} / 0.7)^{-0.248} \times (\text{SCys} / 0.8)^{-0.711} \times 0.995^{\text{Age}}$ |
| Female            | $> 0.7$          | $\leq 0.8$       | $130 \times (\text{SCr} / 0.7)^{-0.601} \times (\text{SCys} / 0.8)^{-0.375} \times 0.995^{\text{Age}}$ |
|                   |                  | $> 0.8$          | $130 \times (\text{SCr} / 0.7)^{-0.601} \times (\text{SCys} / 0.8)^{-0.711} \times 0.995^{\text{Age}}$ |
| Male              | $\leq 0.9$       | $\leq 0.8$       | $135 \times (\text{SCr} / 0.9)^{-0.207} \times (\text{SCys} / 0.8)^{-0.375} \times 0.995^{\text{Age}}$ |
|                   |                  | $> 0.8$          | $135 \times (\text{SCr} / 0.9)^{-0.207} \times (\text{SCys} / 0.8)^{-0.711} \times 0.995^{\text{Age}}$ |
| Male              | $> 0.9$          | $\leq 0.8$       | $135 \times (\text{SCr} / 0.9)^{-0.601} \times (\text{SCys} / 0.8)^{-0.375} \times 0.995^{\text{Age}}$ |
|                   |                  | $> 0.8$          | $135 \times (\text{SCr} / 0.9)^{-0.601} \times (\text{SCys} / 0.8)^{-0.711} \times 0.995^{\text{Age}}$ |
| CAPA              |                  |                  | $130 \times \text{SCys}^{-1.069} \times \text{age}^{-0.117} - 7$                                       |

SCre, serum creatinine; SCys, serum cystatin C.

**Supplementary Table 2: Additional characteristics of the participants.**

|                                             | <b>Total</b><br><b>(n = 197)</b> | <b>Training</b><br><b>(n = 129)</b> | <b>Validation</b><br><b>(n = 68)</b> | <b>P</b> |
|---------------------------------------------|----------------------------------|-------------------------------------|--------------------------------------|----------|
| Systolic blood pressure, mmHg               | 129.0 ± 17.4                     | 128.8 ± 17.2                        | 129.3 ± 17.7                         | 0.86     |
| Diastolic blood pressure, mmHg              | 77.4 ± 11.4                      | 77.5 ± 11.3                         | 77.2 ± 11.8                          | 0.87     |
| Serum creatinine, mg/dL                     |                                  |                                     |                                      |          |
| Female                                      | 0.71 ± 0.21                      | 0.70 ± 0.22                         | 0.72 ± 0.20                          | 0.64     |
| Male                                        | 1.08 ± 0.40                      | 1.09 ± 0.41                         | 1.04 ± 0.38                          | 0.58     |
| Serum D-serine, μM                          | 2.4 ± 0.9                        | 2.5 ± 0.9                           | 2.4 ± 0.8                            | 0.54     |
| Serum protein, g/dL                         | 6.7 ± 0.5                        | 6.7 ± 0.5                           | 6.6 ± 0.5                            | 0.27     |
| Serum UN, mg/dL                             | 15.2 ± 4.7                       | 15.1 ± 4.9                          | 15.4 ± 4.2                           | 0.59     |
| Serum Na, mEq/L                             | 138.6 ± 2.2                      | 138.6 ± 2.3                         | 138.7 ± 2.0                          | 0.71     |
| Serum K, mEq/L                              | 4.0 ± 0.3                        | 4.1 ± 0.3                           | 4.0 ± 0.4                            | 0.52     |
| Serum Cl, mEq/L                             | 103.8 ± 2.7                      | 103.7 ± 2.7                         | 104.0 ± 2.6                          | 0.43     |
| Serum adjusted Ca, mg/dL                    | 9.3 ± 0.5                        | 9.3 ± 0.5                           | 9.4 ± 0.5                            | 0.23     |
| Serum iP, mg/dL                             | 3.1 ± 0.6                        | 3.1 ± 0.6                           | 3.2 ± 0.6                            | 0.21     |
| Serum AST, U/L                              | 21.5 ± 12.7                      | 21.7 ± 15.0                         | 21.2 ± 6.7                           | 0.80     |
| Serum ALT, U/L                              | 18.0 ± 12.0                      | 17.5 ± 11.4                         | 19.2 ± 13.1                          | 0.33     |
| Serum T-Cho, mg/dL                          | 196.4 ± 38.9                     | 193.9 ± 40.8                        | 201.2 ± 35.0                         | 0.21     |
| Serum TG, mg/dL                             | 125.9 ± 98.4                     | 119.4 ± 94.2                        | 138.3 ± 105.4                        | 0.20     |
| Serum β 2-microglobulin, μg/L               | 2.1 ± 1.2                        | 2.2 ± 1.2                           | 2.1 ± 1.2                            | 0.65     |
| Blood WBC, ×10 <sup>3</sup> /μL             | 5.5 ± 1.6                        | 5.6 ± 1.5                           | 5.2 ± 1.6                            | 0.15     |
| Blood PLT, ×10 <sup>3</sup> /μL             | 228.0 ± 60.1                     | 230.4 ± 64.8                        | 223.6 ± 52.6                         | 0.46     |
| CKD-EPI_cre, mL/min/1.73 m <sup>2</sup>     | 85.3 ± 20.4                      | 84.9 ± 21.7                         | 86.1 ± 18.0                          | 0.69     |
| CKD-EPI_cys, mL/min/1.73 m <sup>2</sup>     | 78.1 ± 25.0                      | 77.0 ± 25.4                         | 80.2 ± 24.3                          | 0.40     |
| CKD-EPI_cre-cys, mL/min/1.73 m <sup>2</sup> | 80.4 ± 22.7                      | 79.7 ± 23.4                         | 81.7 ± 21.4                          | 0.55     |
| CAPA, mL/min/1.73 m <sup>2</sup>            | 74.8 ± 23.4                      | 73.8 ± 23.7                         | 76.6 ± 22.9                          | 0.43     |

Data are mean ± SD. *P* values were given for the difference between the training and validation cohorts. Estimated glomerular filtration rates (eGFRs) were calculated as reported<sup>4,19</sup>.

**Supplementary Table 3: Comparison of equations based on clearances of D-serine and creatinine for inulin clearance in the training dataset.**

|                                                   | <b>Slope (95%CI)</b> | <b>Intercept (95%CI)</b> |
|---------------------------------------------------|----------------------|--------------------------|
| Combination of D-serine and creatinine clearances | 1.065 (0.998–1.131)  | -4.30 (-8.87–0.28)       |
| D-Serine clearance                                | 1.109 (1.020–1.197)  | -7.22 (-13.33–1.12)      |
| Creatinine clearance                              | 1.076 (1.004–1.118)  | -5.04 (-10.03–0.04)      |

Slopes and intercepts of Deming regression lines are shown. CI, confidence interval.

**Supplementary Table 4: Coefficients of equation for inulin clearance using clearances of serum D-serine and creatinine in the training dataset.**

| Parameter for equation                                  | Equation for GFR                                                 | 95% CI of coefficient |                      |             |
|---------------------------------------------------------|------------------------------------------------------------------|-----------------------|----------------------|-------------|
|                                                         |                                                                  | D-Serine clearance    | Creatinine clearance | Intercept   |
| Combination of serum D-serine and creatinine clearances | $0.347 \times C\text{-Dser} + 0.447 \times C\text{-cre} + 4.530$ | 0.150–0.543           | 0.341–0.552          | 0.372–8.688 |

C-DSer and C-cre, clearances of D-serine and creatinine, respectively. GFR, glomerular filtration rate; CI, confidence interval.

**Supplementary Table 5: Evaluation of equation based on clearances of serum D-serine and creatinine for inulin clearance in the training dataset.**

|                                                         | <b>Slope (95% CI)</b> | <b>Intercept (95% CI)</b> |
|---------------------------------------------------------|-----------------------|---------------------------|
| Combination of serum D-serine and creatinine clearances | 1.068 (1.000–1.136)   | -4.52 (-9.22–0.19)        |

Slopes and intercepts of Deming regression lines are shown. CI, confidence interval.

**Supplementary Table 6: Performance of equations in the validation dataset using clearance of serum D-serine and other formulas for estimated glomerular filtration rate (eGFR).**

| Equations         | R <sup>2</sup> | Bias (95% CI)    | IQR (95% CI)     | RMSE (95% CI)    | P30% (95% CI)     | P15% (95% CI)    | P7.5% (95% CI)   |
|-------------------|----------------|------------------|------------------|------------------|-------------------|------------------|------------------|
| Serum combination | 0.90           | 3.0 (2.5–5.5)    | 6.2 (4.2–9.0)    | 6.4 (5.3–7.7)    | 98.5 (91.4–100.0) | 88.2 (78.2–94.2) | 61.8 (49.9–72.4) |
| CKD-EPI_cre       | 0.55           | 18.0 (14.7–20.5) | 16.3 (11.7–23.2) | 13.6 (11.0–17.2) | 54.4 (42.7–65.7)  | 26.5 (17.4–38.1) | 11.8 (5.8–21.8)  |
| CKD-EPI_cys       | 0.61           | 11.4 (6.6–16.2)  | 20.5 (15.0–27.9) | 15.2 (12.9–17.7) | 69.1 (57.3–78.9)  | 47.1 (35.7–58.8) | 23.5 (14.9–35.0) |
| CKD-EPI_cre-cys   | 0.67           | 13.1 (10.0–15.7) | 15.0 (10.2–22.3) | 12.5 (10.1–15.7) | 61.8 (49.9–72.4)  | 35.3 (25.0–47.2) | 22.1 (13.7–33.4) |
| CAPA              | 0.60           | 12.1 (10.7–13.6) | 17.0 (14.1–20.9) | 12.6 (10.1–15.9) | 76.5 (64.6–85.9)  | 54.4 (41.9–66.6) | 38.2 (26.7–50.8) |

Serum combination, equation based on a combination of clearances of serum D-serine and creatinine. Estimated glomerular filtration rates (eGFRs) were calculated as reported.<sup>4,19</sup> Bias, absolute value of residual. IQR, interquartile range of difference; RMSE, root mean square error. Accuracy was calculated as the percentage of estimates that differed from inulin clearance by less than 30%, 15%, and 7.5% (P<sub>30</sub>, P<sub>15</sub>, and P<sub>7.5</sub>). CI, confidence interval.

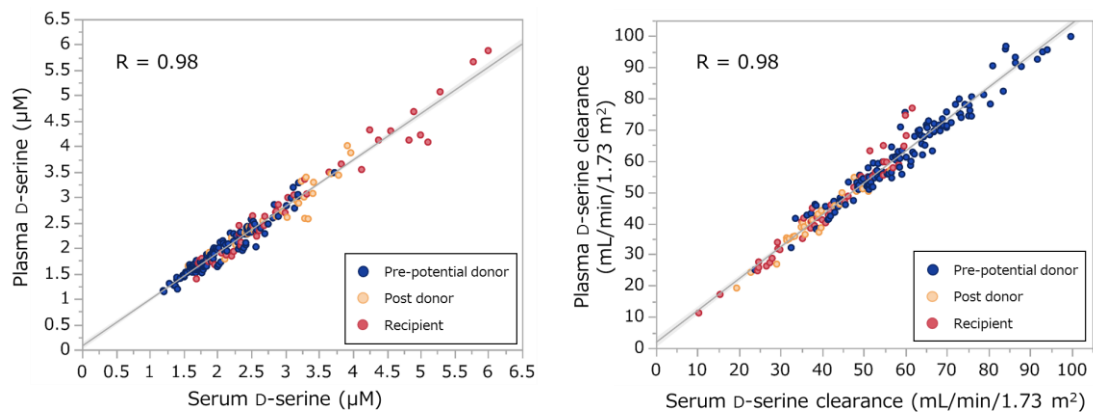

**Supplementary Figure S1: Blood levels and clearances of D-serine in plasma and serum.**

Gray line shows the linear regression and gray area represents a 95% confidence interval. R, Pearson's correlation coefficient.



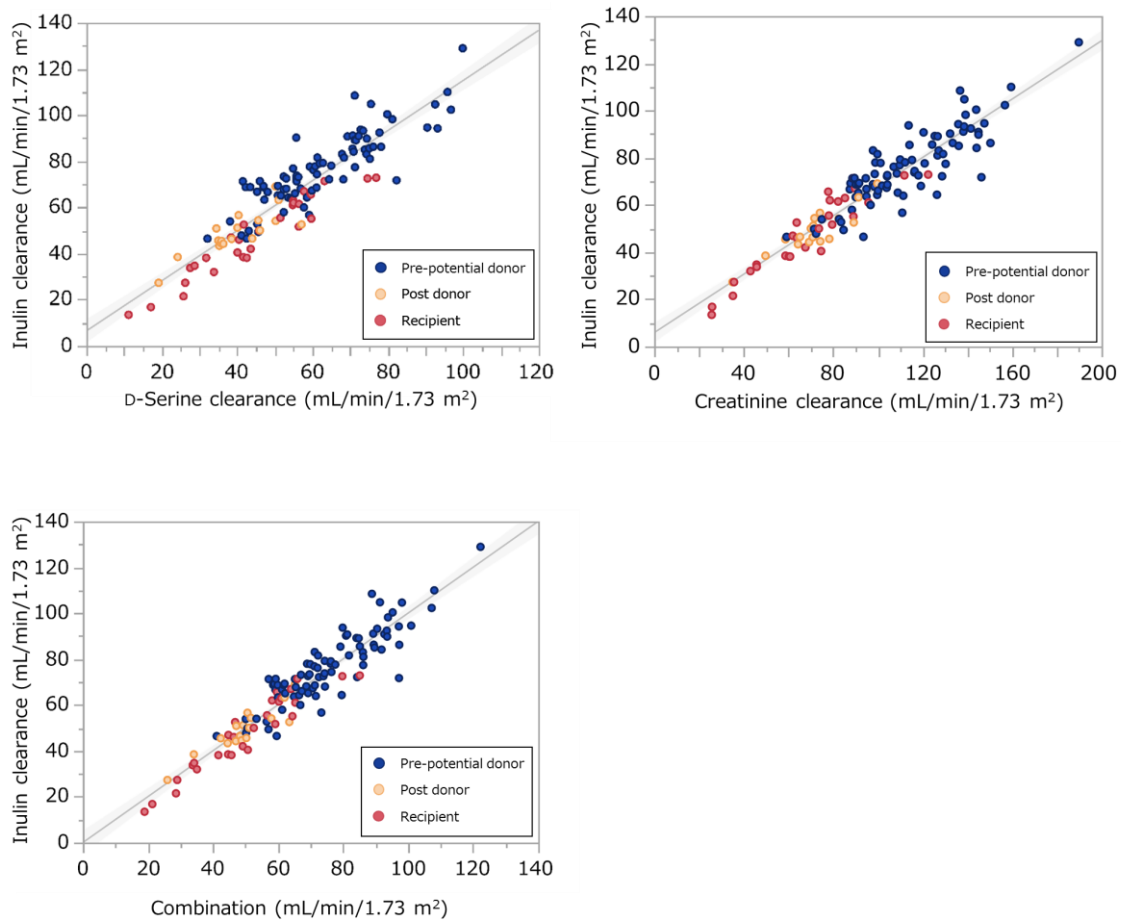

**Supplementary Figure S2: Regression line for calculating the prediction equations based on clearances of plasm D-serine and creatinine in the training dataset.**

Grey area represents a 95% confidence interval.

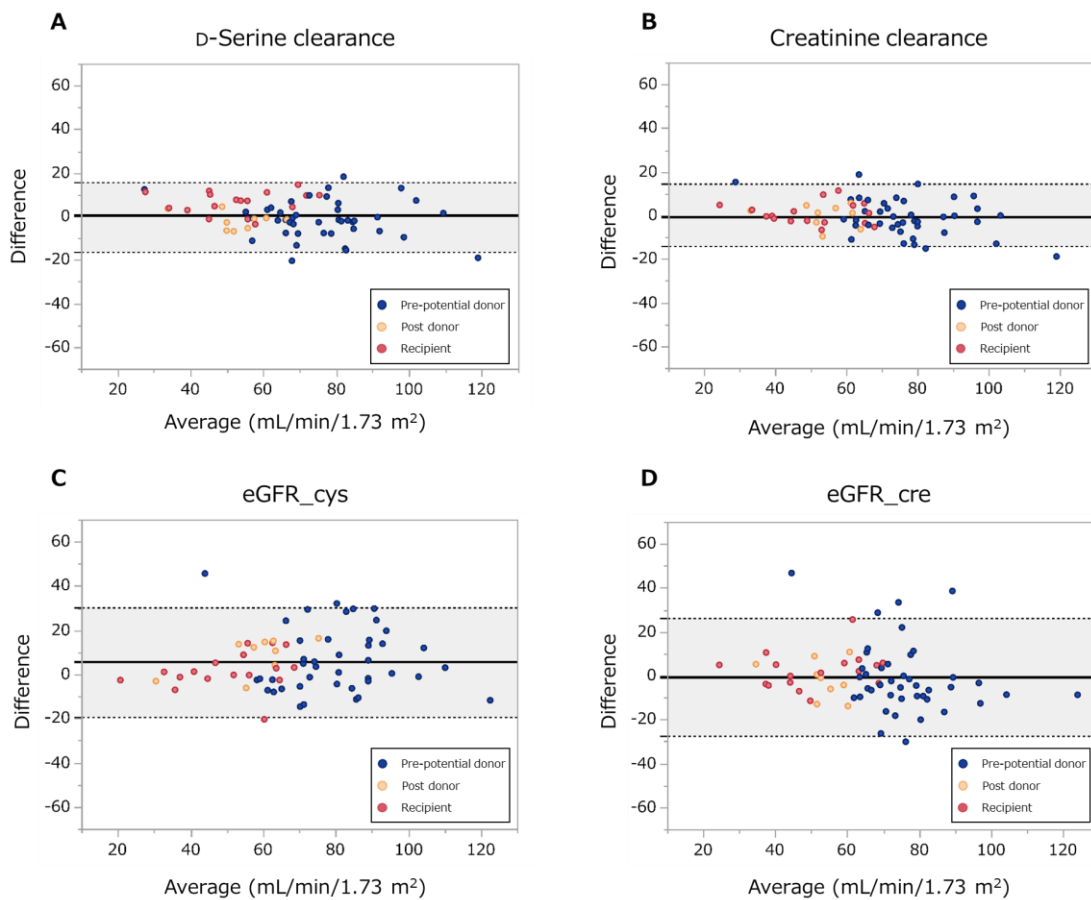

**Supplementary Figure S3: Bland-Altman plots of equations for inulin clearance in the validation dataset.**

(A-B) Equations based on (A) the D-serine clearance, (B) creatinine clearance, and (C-D) estimated glomerular filtration rate (eGFR) based on (C) creatinine (eGFR\_cre), and (D) cystatin C (eGFR\_cys) by Japanese formula.<sup>2,18</sup> The solid black line and gray area show the mean of the difference and 95% limits of agreement.

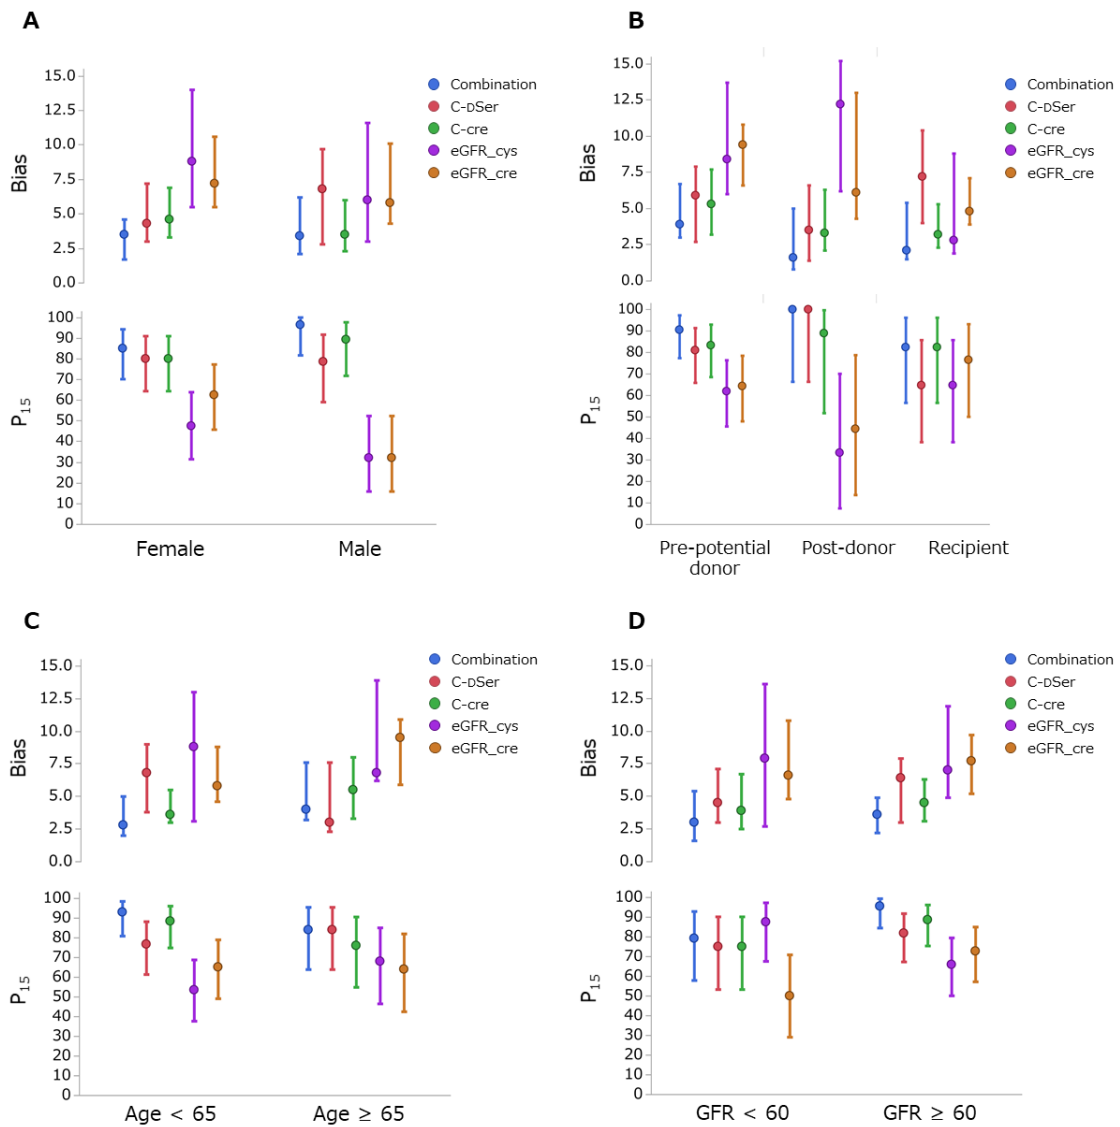

**Supplementary Figure S4: Subgroup analysis of bias and P<sub>15</sub>.**

(A) Sex, (B) transplantation-related status, (C) age, and (D) glomerular filtration rate (GFR). Bars indicate 95% confidence intervals. C-dSer and C-cre, clearances of D-serine and creatinine, respectively; eGFR\_cre and eGFR\_cys, creatinine- and cystatin C-based estimated GFRs (eGFRs), respectively, based on the Japanese formula.<sup>2,18</sup>

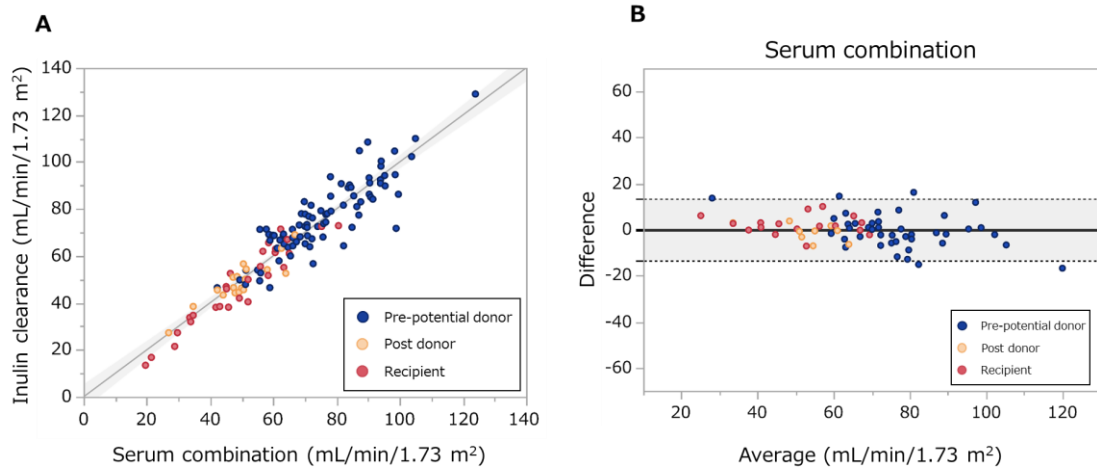

**Supplementary Figure S5: Equation using combination of clearances of serum D-serine and creatinine and its agreement.**

(A) Regression line for calculating the prediction equation based on a combination of clearances of serum D-serine and creatinine in the training dataset. Grey area represents a 95% confidence interval. (B) Bland-Altman plot of equation for inulin clearance in the validation cohort. Equation is based on the combination of serum D-serine clearance and creatinine clearance. The solid black line and gray area show the mean of the difference and 95% limits of agreement.
